# Supplementary material for: Localization of Epigenetic Markers in Leishmania Chromatin
Source: MDPI journal article supplement (doi:10.3390/pathogens11080930), 2022-08-18
Supplement: s1 [file s1]

**Table S1:** LtaP\_2016 chromosomes and genes

| Chromosome | Sequence   |      |      | pseudogenes | rRNAs | Genes  |         |        |       |
|------------|------------|------|------|-------------|-------|--------|---------|--------|-------|
|            | Length     | Gaps | CDSs |             |       | sIRNAs | snoRNAs | snRNAs | tRNAs |
| 01         | 293,541    | 0    | 92   |             |       |        |         |        |       |
| 02         | 358,489    | 0    | 100  |             |       | 46     |         |        |       |
| 03         | 374,440    | 0    | 95   |             |       |        |         |        | 2     |
| 04         | 436,848    | 0    | 143  |             |       |        |         |        |       |
| 05         | 487,637    | 0    | 130  |             | 1     |        | 26      |        | 1     |
| 06         | 518,584    | 0    | 143  |             |       |        |         |        | 1     |
| 07         | 563,013    | 0    | 159  |             |       |        |         |        | 1     |
| 08         | 441,906    | 0    | 125  |             |       |        |         |        |       |
| 09         | 567,671    | 0    | 198  |             | 3     |        |         |        | 9     |
| 10         | 654,149    | 2    | 307  |             |       |        |         |        | 2     |
| 11         | 547,029    | 0    | 153  |             | 3     |        |         |        | 7     |
| 12         | 636,574    | 2    | 166  |             |       |        |         |        |       |
| 13         | 648,292    | 0    | 178  |             |       |        |         |        |       |
| 14         | 592,770    | 0    | 160  |             |       |        |         |        |       |
| 15         | 627,951    | 1    | 184  |             |       |        |         |        | 2     |
| 16         | 669,457    | 0    | 210  |             |       |        |         |        | 1     |
| 17         | 688,786    | 0    | 198  |             |       |        |         |        | 3     |
| 18         | 730,895    | 0    | 167  |             |       |        |         |        |       |
| 19         | 661,934    | 0    | 183  |             |       |        |         |        |       |
| 20         | 685,981    | 0    | 178  |             |       |        |         |        |       |
| 21         | 773,031    | 1    | 247  |             | 2     |        |         |        | 4     |
| 22         | 704,081    | 0    | 189  |             |       |        |         |        |       |
| 23         | 737,501    | 0    | 204  |             | 1     |        |         |        | 10    |
| 24         | 869,383    | 0    | 280  |             |       |        |         | 1      | 6     |
| 25         | 884,399    | 0    | 282  |             |       |        |         |        |       |
| 26         | 1,068,160  | 0    | 296  |             |       |        |         |        |       |
| 27         | 1,180,796  | 4    | 296  |             | 16    |        |         |        |       |
| 28         | 1,165,224  | 0    | 340  | 1           |       |        |         |        | 1     |
| 29         | 1,188,875  | 0    | 304  |             |       |        |         |        | 2     |
| 30         | 1,338,345  | 0    | 419  |             |       |        |         |        | 1     |
| 31         | 1,694,416  | 2    | 407  |             |       |        |         | 1      | 6     |
| 32         | 1,531,139  | 0    | 432  | 1           |       |        |         |        | 1     |
| 33         | 1,513,194  | 2    | 395  |             | 1     |        |         |        | 6     |
| 34         | 1,679,285  | 0    | 458  |             |       |        |         |        | 11    |
| 35         | 1,982,148  | 0    | 572  | 2           |       |        |         |        |       |
| 36         | 2,696,151  | 0    | 778  |             |       |        |         |        | 12    |
| Total      | 32,192,075 | 14   | 9168 | 4           | 27    | 46     | 26      | 2      | 89    |

**Table S2.** *L. tarentolae* centromeres.

| Chr | location | J-peak | type     | AT-rich | RNA genes     |
|-----|----------|--------|----------|---------|---------------|
| 1   | 270K     | 1.2    | iTTS/TSS | Y       |               |
| 2   | 230K     | 2.2    | dTSS     | Y       | siRNA         |
| 3   | 240K     | 3.2    | iTTS/TSS | Y       | tRNA?         |
| 4   | 115K     | 4.2    | cTTS     | (Y)     |               |
| 5   | 367K     | 5.3    | cTTS     | Y       | tRNAs         |
| 6   | 124K     | 6.2    | dTSS     | Y       |               |
| 7   | 210K     | 7.3    | dTSS     | (Y)     |               |
| 8   | 370K     | 8.3    | dTSS     | Y       |               |
| 9   | 270K     | 9.2    | cTTS     | Y       | tRNAs/5S rRNA |
| 10  | 527K     | 10.3   | iTTS/TSS | Y       |               |
| 11  | 169K     | 11.2   | iTTS/TSS | Y       | tRNAs/5S rRNA |
| 12  | 287K     | 12.5   | dTSS     | Y       |               |
| 13  | 142K     | 13.2   | dTSS     | Y       |               |
| 14  | 158K     | 14.2   | cTTS     | Y       |               |
| 15  | 335K     | 15.5   | cTTS     | Y       | tRNAs         |
| 16  | 337K     | 16.2   | dTSS     | Y       |               |
| 17  | 371K     | 17.5   | iTTS/TSS | Y       | tRNAs         |
| 18  | 461K     | 18.2   | iTTS/TSS | (Y)     |               |
| 19  | 603K     | 19.3   | iTTS/TSS | Y       |               |
| 20  | 484K     | [20.3] | iTTS/TSS | Y       |               |
| 21  | 222K     | 21.3   | dTSS     | Y       |               |
| 22  | 605K     | 22.4   | dTSS     | (Y)     |               |
| 23  | 529K     | 23.5   | dTSS     | Y       |               |
| 24  | 470K     | [24.3] | iTTS/TSS | Y       |               |
| 25  | 576K     | 25.3   | iTTS/TSS | Y       |               |
| 26  | 592K     | 26.4   | iTTS/TSS | Y       |               |
| 27  | 992K     | 27.5   | dTSS     | Y       | rRNAs         |
| 28  | 825K     | 28.6   | dTSS     | Y       |               |
| 29  | 335K     | 29.2   | iTTS/TSS | Y       |               |
| 30  | 235K     | 30.2   | dTSS     | Y       |               |
| 31  | 806K     | 31.6   | iTTS/TSS | (Y)     |               |
| 32  | 1175K    | 32.4   | dTSS     | Y       |               |
| 33  | 676K     | 33.4   | iTTS/TSS | Y       | rRNA          |
| 34  | 310K     | 34.2   | cTTS     | Y       |               |
| 35  | 368K     | 35.3   | iTTS/TSS | Y       |               |
| 36  | 1071K    | 36.6   | iTTS/TSS | (Y)     |               |

**Table S3.** Illumina sequencing libraries used in this study.

| Library | Type     | Description                         | Read pairs | Reads aligned |
|---------|----------|-------------------------------------|------------|---------------|
| JM245   | ATAC-seq | Chromatin (1×10 <sup>7</sup> cells) | 15,400,176 | 18,482,265    |
| JM246   | ATAC-seq | Chromatin (2×10 <sup>7</sup> cells) | 13,927,507 | 16,437,621    |
| JM247   | ATAC-seq | Genomic DNA                         | 23,146,209 | 37,159,619    |
| JM265   | CUT&Tag  | Anti-H2A                            | 29,130,416 | 39,394,805    |
| JM266   | CUT&Tag  | Anti-H2A.Z                          | 24,059,103 | 32,867,982    |
| JM267   | CUT&Tag  | Anti-H2B                            | 11,462,422 | 12,207,997    |
| JM268   | CUT&Tag  | Anti-H2B.V                          | 16,883,972 | 20,471,031    |
| JM270   | CUT&Tag  | Anti-H3V                            | 13,422,639 | 16,013,889    |
| JM271   | CUT&Tag  | Anti-H3K4me3                        | 15,184,278 | 21,293,837    |
| JM272   | CUT&Tag  | Anti-H3K16ac                        | 16,056,466 | 20,339,157    |
| JM273   | CUT&Tag  | Anti-H3K36me3                       | 12,432,560 | 12,318,025    |
| JM274   | CUT&Tag  | Anti-H3K50ac                        | 3,270,369  | 3,078,271     |
| JM275   | CUT&Tag  | Anti-H3K20me2                       | 10,657,268 | 10,955,351    |
| JM276   | CUT&Tag  | Anti-H3K76me3 ( <i>T. brucei</i> )  | 3,867,726  | 4,666,603     |
| JM277   | CUT&Tag  | Anti-H4                             | 183,363    | 253,271       |
| JM278   | CUT&Tag  | Anti-H3 ( <i>T. brucei</i> )        | 92,468,418 | 153,273,517   |
| JM279   | CUT&Tag  | Anti-HRP                            | 7,881,445  | 7,987,290     |
| JM442   | J-IPseq  | Anti-J                              | 17,485,977 | 14,993,470    |
| JM443   | J-IPseq  | No antibody                         | 24,973,064 | 31,796,395    |
